# Supplementary material
Source: PubMed Central journal article supplement (PMC2934816)
Supplement: 091304_2.pdf [file 091304_2.pdf]

**Appendix 2 (as submitted by author). Characteristics of excluded studies reporting an influenza immunization campaign in long-term care homes**

| Study                            | Country     | *Study Design | Intervention Campaign Components |                |                         |                   |             | Results                                                       | Other Study Details                                                                                                        |
|----------------------------------|-------------|---------------|----------------------------------|----------------|-------------------------|-------------------|-------------|---------------------------------------------------------------|----------------------------------------------------------------------------------------------------------------------------|
|                                  |             |               | Education / Promotion            | Improve Access | Legislation/ Regulation | Measure/ Feedback | Role Models |                                                               |                                                                                                                            |
| McLeod 2001 (1)                  | Canada      | CSS           | ×                                |                |                         |                   |             | Rates not reported                                            | Staff meetings to talk about strategies                                                                                    |
| Neudorf 2003 (2)                 | Canada      | ITS           | ×                                |                |                         |                   |             | 1999: 25% immunized<br>2001: 57% immunized                    | ITS not enough observation points                                                                                          |
| Sullivan 2008 (3)                | Canada      | PO            | ×                                |                |                         |                   |             | 67% preferred vaccine                                         | Ottawa Influenza Decision Aid                                                                                              |
| †McArthur 1999 (4)               | Canada      | CSS           |                                  | ×              |                         |                   |             | 3.7% of sites reported<br>>75% immunized                      | Promotion/encouragement of influenza vaccine associated with increased uptake                                              |
| Looijamns-van den Akker 2007 (5) | Netherlands | BnA           |                                  |                | ×                       |                   |             | Before 2004: 5-8%<br>After 2004: 11%                          | Introduction of national guidelines on influenza immunization in 2004                                                      |
| †Hauri 2006 (6)                  | Germany     | CSS           | ×                                | ×              |                         |                   |             | All sites with 50-69% uptake had an active campaign for HCPs  | Surveyed directors of LTCHs for campaign practices                                                                         |
| †Maltezou 2008 (7)               | Greece      | CSS           | ×                                | ×              |                         |                   |             | Mean 16.4% immunized                                          | Training of infection control nurse;                                                                                       |
| ‡Song 2006 (8)                   | Korea       | ITS           | ×                                | ×              |                         |                   |             | 2000: 23% immunized<br>2003-04:78% immunized                  | Observation points shown graphically                                                                                       |
| Tapiainen 2005 (9)               | Switzerland | BnA           | ×                                | ×              |                         |                   |             | Pre: 19% immunized<br>Post: 24% immunized                     |                                                                                                                            |
| Manuel 2002 (10)                 | Canada      | CSS           | ×                                | ×              |                         |                   |             | Rates not reported                                            | 'The Big Shot Challenge'                                                                                                   |
| †Russell 2001 (11)               | Canada      | CSS           | ×                                | ×              |                         | ×                 |             | Median 29.9% immunized                                        | Monitoring compliance; Reminder systems; Written staff immunize policy                                                     |
| Festini 2007 (12)                | Italy       | PO            | ×                                | ×              |                         |                   | ×           | 30.3% immunized                                               | Peer vaccination                                                                                                           |
| Bannerman 1992 (13)              | Canada      | BnA           | ×                                | ×              |                         | ×                 | ×           | Pre: 6-10% immunized<br>Post: 34-41% immunized                | Competition between wards; Dignitaries vaccinated                                                                          |
| ‡Nace 2007 (14)                  | USA         | ITS           | ×                                |                | ×                       | ×                 | ×           | 1996-97: 54% uptake<br>2005-06: 86% uptake                    | Unclear intervention point                                                                                                 |
| †Sand 2007 (15)                  | USA         | BnA           | ×                                | ×              | ×                       |                   | ×           | 10 teams improved by at least 10%; 3 teams had ≥80% immunized | Rapid cycle quality improvement (RCQI); Interventions tailored to self-identified barriers and previous research           |
| †Halliday 2003 (16)              | Australia   | CSS           | ×                                | ×              | ×                       |                   | ×           | 28% immunized                                                 | Policy of staff vaccination                                                                                                |
| †Stevenson 2001 (17)             | Canada      | CSS           |                                  |                |                         |                   |             | 35% immunized                                                 | Higher uptake associated with having an infection control practitioner, and offering vaccine in winter and to casual staff |

\*Study designs: PO (Post-Only), ITS (Interrupted Time Series), BnA (1-group Before and After), CSS (Cross-Sectional Study)

†Interventions were not implemented by all participating organizations

‡Interventions were not implemented concurrently

Post-only, cross-sectional, before-and-after studies were excluded based on study design. Reasons for excluding specific interrupted time series studies are provided under the "other study details" column. Full references provided in Appendix 5
