# Supplementary material
Source: PubMed Central journal article supplement (PMC2934816)
Supplement: 091304_3.pdf [file 091304_3.pdf]

**Appendix 3 (as submitted by author). Characteristics of excluded studies reporting an influenza immunization campaign in a hospital setting**

| Study                | Country   | *Study Design | Intervention Campaign Components |                |                         |                   |             | Results                                                                               | Other Campaign Details                                                                                     |
|----------------------|-----------|---------------|----------------------------------|----------------|-------------------------|-------------------|-------------|---------------------------------------------------------------------------------------|------------------------------------------------------------------------------------------------------------|
|                      |           |               | Education / Promotion            | Improve Access | Legislation/ Regulation | Measure/ Feedback | Role Models |                                                                                       |                                                                                                            |
| Qureshi 2004 (18)    | UK        | CSS           | ×                                |                |                         |                   |             | 28% immunized                                                                         | Local media releases                                                                                       |
| †Leitmeyer 2006 (19) | Germany   | ITS           | ×                                |                |                         |                   |             | 2001-02: 21% uptake<br>2003-04: 26% uptake                                            | ITS not enough observation points                                                                          |
| †O'Reilly 2005 (20)  | Ireland   | CSS           | ×                                |                |                         |                   |             | 3.4 – 17.6% immunized                                                                 | General and targeted publicity methods                                                                     |
| Chittaro 2009 (21)   | Italy     | ITS           |                                  | ×              |                         |                   |             | Before: 10.4% uptake<br>After (2005): 36.6%<br>After (2006): 23.3%                    | Public health doctors visited wards to provide vaccine; "Avian flu crisis" in 2005 may have affected rates |
| Piccirillo 2006 (22) | USA       | CSS           |                                  | ×              |                         |                   |             | 50% immunized                                                                         |                                                                                                            |
| Pur 2005 (23)        | USA       | PO            |                                  | ×              |                         |                   |             | Clinic: 1 vaccine per 2.5 mins/vaccinator<br>Cart: 1 vaccine per 3.0 mins/ vaccinator | 1-day vaccination drill:<br>3 hrs of large vaccination clinics;<br>8 hrs of mobile carts                   |
| Adal 1996 (24)       | USA       | ITS           |                                  | ×              |                         |                   |             | Graph showed increased uptake                                                         | Observation points shown graphically                                                                       |
| Jones 1999 (25)      | Australia | PO            |                                  | ×              |                         |                   |             | 24% immunized                                                                         |                                                                                                            |
| O'Rorke 2003 (26)    | Ireland   | CSS           |                                  | ×              |                         |                   |             | 17.5% immunized                                                                       |                                                                                                            |
| Lee 2007 (27)        | Singapore | BnA           |                                  | ×              |                         |                   |             | Pre: 56.8% immunized<br>Post: 66.4% immunized                                         |                                                                                                            |
| Yang 2007 (28)       | Singapore | PO            |                                  | ×              |                         |                   |             | 56.8% immunized                                                                       | Exercise for pandemic influenza                                                                            |
| Yassi 1991 (29)      | Canada    | PO            |                                  | ×              |                         |                   |             | 6-11% immunized                                                                       |                                                                                                            |
| Polgreen 2008 (30)   | USA       | BnA           |                                  |                | ×                       |                   |             | Mean rate change: 12%                                                                 | Declination statements                                                                                     |
| Smithers 2003 (31)   | Australia | PO            |                                  |                |                         |                   | ×           | 54% immunized                                                                         | Immunization coordinator designated                                                                        |
| ‡Fedson 1996 (32)    | USA       | ITS           |                                  |                |                         |                   | ×           | 1986: 24% immunized<br>1993: 63% immunized                                            | ITS not enough observation points                                                                          |
| Primus 2009 (33)     | USA       | BnA           | ×                                | ×              |                         |                   |             | 2006: 9%<br>2008: 44%                                                                 | Roving clinics and education                                                                               |
| de Juanes 2004 (34)  | Spain     | ITS           | ×                                | ×              |                         |                   |             | 2001-02: 15.9%<br>2002-03: 21.4%<br>2003-04: 40.4%                                    | ITS not enough observation points                                                                          |
| Norton 2008 (35)     | Canada    | PO            | ×                                | ×              |                         |                   |             | 78% immunized                                                                         | Multiple clinics and mobile vaccine carts                                                                  |
| Traeger 2006 (36)    | USA       | PO            | ×                                | ×              |                         |                   |             | 72.8% immunized                                                                       | Radio broadcast; Immunization workshop;<br>CDC recommendations                                             |
| Shah 2008 (37)       | USA       | BnA           | ×                                | ×              |                         |                   |             | Pre: 32% immunized<br>Post: 67% immunized                                             | Originally set up as a program to increase uptake among parents                                            |

| Study                    | Country   | *Study Design | Intervention Campaign Components |                |                         |                   |             | Results                                                                     | Other Campaign Details                                                                                           |
|--------------------------|-----------|---------------|----------------------------------|----------------|-------------------------|-------------------|-------------|-----------------------------------------------------------------------------|------------------------------------------------------------------------------------------------------------------|
|                          |           |               | Education / Promotion            | Improve Access | Legislation/ Regulation | Measure/ Feedback | Role Models |                                                                             |                                                                                                                  |
| Begue 1998 (38)          | USA       | BnA           | ×                                | ×              |                         |                   |             | Pre: 21% immunized<br>Post: 38% immunized                                   | Addressed concerns highlighted by baseline survey                                                                |
| †Bryant 2004 (39)        | USA       | CSS           | ×                                | ×              |                         |                   |             | Median 43% uptake                                                           | Network provided educational materials as requested                                                              |
| Wells 2008 (40)          | USA       | BnA           | ×                                | ×              |                         |                   |             | Pre: 39% immunized<br>Post: 48% immunized                                   | Peer vaccination;<br>Reviewed literature for campaign ideas                                                      |
| Girasek 1990 (41)        | USA       | BnA           | ×                                | ×              |                         |                   |             | Pre: 9- 11% immunized<br>Post: 30-36% immunized                             | Buttons for immunized HCWs;<br>Literature review on staff compliance                                             |
| Smedley 2002 (42)        | UK        | ITS           | ×                                | ×              |                         |                   |             | 1995: 2.0% immunized<br>1999: 4.5% immunized                                | ITS not enough observation points                                                                                |
| Carman 2000 (43)         | UK        | CRCT          | ×                                | ×              |                         |                   |             | 49.8% immunized                                                             |                                                                                                                  |
| Lopes 2008 (44)          | Brazil    | ITS           | ×                                | ×              |                         |                   |             | 2004: 6% immunized<br>2007: 48.5% immunized                                 | ITS not enough observation points                                                                                |
| Takayanagi 2007 (45)     | Brazil    | ITS           | ×                                | ×              |                         |                   |             | 2003 (intervention): 34%<br>2005: 12.8%                                     | ITS not enough observation points                                                                                |
| Wicker 2007 (46)         | Germany   | PO            | ×                                | ×              |                         |                   |             | 35.8% immunized                                                             |                                                                                                                  |
| Watanakunakorn 1993 (47) | USA       | BnA           | ×                                | ×              |                         |                   |             | 1990: 18.1% immunized<br>1991: 30.2% immunized                              |                                                                                                                  |
| Hall 1998 (48)           | USA       | BnA           | ×                                | ×              |                         |                   |             | Pre: 34-55% immunized<br>Post: 100% immunized                               | Emailed reminders;<br>Infection Control Fair                                                                     |
| Sartor 2004 (49)         | France    | ITS           | ×                                | ×              |                         |                   |             | 1998: 6% immunized<br>2002: 32% immunized                                   | ITS not enough observation points                                                                                |
| Chamoux 2006 (50)        | France    | BnA           | ×                                | ×              |                         |                   |             | Pre: 4.8% immunized<br>Post: 12.6% immunized                                |                                                                                                                  |
| Elorza 2002 (51)         | Spain     | PO            | ×                                | ×              |                         |                   |             | 12.7-14.7% immunized                                                        |                                                                                                                  |
| Norton 2008 (35)         | Canada    | PO            | ×                                | ×              |                         |                   |             | 78% immunized nurses                                                        |                                                                                                                  |
| Jacomo 2001 (52)         | France    | PO            | ×                                | ×              |                         |                   |             | 36% immunized                                                               |                                                                                                                  |
| Stewart 2002 (53)        | Australia | BnA           | ×                                |                | ×                       |                   |             | Pre: 19% completed status report;<br>Post: 42% of new HCWs completed report | Employees required to complete a vaccination status report ; New employees introduced to immunization guidelines |
| Stubbe 2007 (54)         | USA       | PO            |                                  | ×              | ×                       |                   |             | 75% immunized                                                               | 2-3 day emergency drill; Special task force                                                                      |
| Nichol 1997 (55)         | USA       | CSS           |                                  | ×              | ×                       |                   |             | 67.4% intended uptake                                                       |                                                                                                                  |
| Cyrnow 2008 (56)         | USA       | BnA           |                                  |                | ×                       |                   | ×           | 20% immunized in 2 hrs                                                      | 2-hour emergency drill                                                                                           |
| Gornick 2007 (57)        | USA       | BnA           | ×                                | ×              | ×                       |                   |             | Pre: 50% immunized<br>Post: 60% immunized                                   | Free luncheon for flu shot Q&A                                                                                   |
| Nafziger 1994 (60)       | USA       | PO            | ×                                | ×              |                         |                   | ×           | 51% of internal medicine residents immunized                                | Free vaccine provided at Health Fair<br>Memo from chairman of department                                         |

| Study                             | Country   | *Study Design | Intervention Campaign Components |                |                         |                   |                                                         | Results                                                                               | Other Campaign Details |
|-----------------------------------|-----------|---------------|----------------------------------|----------------|-------------------------|-------------------|---------------------------------------------------------|---------------------------------------------------------------------------------------|------------------------|
|                                   |           |               | Education / Promotion            | Improve Access | Legislation/ Regulation | Measure/ Feedback | Role Models                                             |                                                                                       |                        |
| Ballestas 2009 (61)               | Australia | BnA           | ×                                | ×              |                         |                   |                                                         |                                                                                       |                        |
| Nicholson 2009 (62)               | USA       | BnA           | ×                                | ×              |                         |                   | Before: 45% immunized<br>After: 65% immunized           | Trained flu coordinators for each unit to be responsible for contacting their workers |                        |
| Chance 2005 (63)                  | USA       | BnA           | ×                                | ×              |                         |                   | Pre: 15-33% immunized<br>Post: 55% immunized            | "I have had my flu vaccine" sticker                                                   |                        |
| Shannon 1993 (64)                 | USA       | BnA           | ×                                | ×              |                         |                   | Pre: 5% immunized<br>Post: 44% immunized                |                                                                                       |                        |
| ‡Mehta 2008 (65)                  | USA       | CSS           | ×                                | ×              |                         |                   | Higher rates for areas with mobile carts                |                                                                                       |                        |
| Dunais 2006 (66)                  | France    | BnA           | ×                                | ×              |                         |                   | Pre: 7% immunized<br>Post: 35% immunized                |                                                                                       |                        |
| †Garcia de Codes Ilario 2004 (67) | Spain     | BnA           | ×                                | ×              |                         |                   | Pre: 20.2% immunized<br>Post: 38.0% immunized           |                                                                                       |                        |
| Ofstead 2008 (68)                 | USA       | CSS           | ×                                | ×              |                         |                   | 64.5% intended uptake                                   |                                                                                       |                        |
| Samms 2004 (69)                   | USA       | BnA           | ×                                | ×              |                         |                   | Pre: ~30% immunized<br>Post: 47% immunized              | Nurse champions trained to educate; Peer vaccination; Corporate goal of 50% uptake    |                        |
| †Gazmararian 2007 (70)            | USA       | CSS           | ×                                | ×              | ×                       | ×                 | Mean 41% immunized                                      | Managers compared rates to other groups                                               |                        |
| McCullers 2006 (71)               | USA       | ITS           | ×                                | ×              |                         | ×                 | 44.7% immunized                                         | ITS not enough observation points                                                     |                        |
| Kuntz 2008 (72)                   | USA       | BnA           | ×                                | ×              |                         | ×                 | Pre: 41% immunized<br>Post: 51% immunized               | 6-day pandemic influenza drill; 'I got it' stickers; Peer vaccination                 |                        |
| Ribner 2008 (73)                  | USA       | BnA           | ×                                | ×              | ×                       | ×                 | Pre: 43% immunized<br>Post: 67% immunized               | Initiated task force; Announced 65% goal                                              |                        |
| Hood 2009 (74)                    | USA       | ITS           | ×                                | ×              | ×                       | ×                 | Pre: 77% immunized<br>Post: 84% immunized               | Did not describe study population and did not report ascertainment of vaccine status  |                        |
| †Polgreen 2008 (75)               | USA       | CSS           | ×                                | ×              | ×                       | ×                 | 41-60% immunized                                        | Survey of immunization practices                                                      |                        |
| ‡Polgreen 2009 (76)               | USA       | CSS           | ×                                | ×              | ×                       | ×                 | Use of declination forms associated with 12.6% increase | Cross sectional survey of influenza campaign activities                               |                        |

\*Study designs: PO (Post-Only), ITS (Interrupted Time Series), BnA (1-group Before and After), CSS (Cross-Sectional Study)

†Interventions were not implemented by all participating organizations

‡Interventions were not implemented concurrently

Post-only, cross-sectional, before-and-after studies were excluded based on study design. Reasons for excluding specific interrupted time series studies are provided under the "other study details" column. Full references provided in Appendix 5
