# Supplementary material
Source: PubMed Central journal article supplement (PMC2934816)
Supplement: 091304_5.pdf [file 091304_5.pdf]

## Appendix 5 (as submitted by author): References of excluded studies

---

1. McLeod L, Lau WW. Decreasing influenza impact in lodges: 1997-2000 calgary regional health authority. *Canadian Journal of Public Health*. 2001;92(4):291-4.
2. Neudorf C, Obayan A, Anderson C, Chomyn J. A collaborative system-wide response to influenza outbreak management in saskatoon health region. *Canadian Journal of Public Health*. *Revue Canadienne de Sante Publique*. 2003;94(5):338-40.
3. Sullivan SM, Pierrynowski-Gallant D, Chambers L, O'Connor A, Bowman S, McNeil S, et al. Influenza vaccination and decisional conflict among regulated and unregulated direct nursing care providers in long-term-care homes. *AAOHN J*. 2008 Feb;56(2):77-84.
4. McAurthur MA, Simor AE, Campbell B, McGeer A. Influenza vaccination in long-term-care facilities programs for success. *Infection Control and Hospital Epidemiology*. 1999;20:499-503.
5. Looijmans-van den Akker I, van Delden JJM, Verheij TJM, van Essen GA, van der Sande MAB, Huscher ME, et al. Which determinants should be targeted to increase influenza vaccination uptake among health care workers in nursing homes? *Vaccine*. 2009 JUL 23;27(34):4724-30.
6. Hauri AM, Uphoff H, Gussmann V, Gawrich S. Factors that affect influenza vaccine uptake among staff of long-term care facilities. *Infection Control and Hospital Epidemiology*. 2006 JUN;27(6):638-41.
7. Maltezou H, Maragos A, Raftopoulos V, Karageorgou K, Halharapi T, Remoudaki H, et al. Strategies to increase influenza vaccine uptake among health care workers in greece. *Scand J Infect Dis*. 2008;40(3):266-8.
8. Song JY, Park CW, Jeong HW, Cheong HJ, Kim WJ, Kim SR. Effect of a hospital campaign for influenza vaccination of healthcare workers. *Infection Control & Hospital Epidemiology*. 2006 Jun;27(6):612-7.
9. Tapiainen T, Bar G, Schaad UB, Heininger U. Influenza vaccination among healthcare workers in a university children's hospital. *Infection Control & Hospital Epidemiology*. 2005 Nov;26(11):855-8.
10. Manuel DG, Henry B, Hockin J, Naus M. Health behaviour associated with influenza vaccination among healthcare workers in long-term-care facilities. *Infection Control and Hospital Epidemiology*. 2002;23:609-614.
11. Russell ML. Influenza vaccination in alberta long-term care facilities. *Can Med Assoc J*. 2001;164(10):1423-7.
12. Festini F, Biermann KP, Neri S, Reali MF, de Martino M. [Influenza vaccination of nurses in an italian pediatric hospital: Effects on absenteeism and on costs, factors associated with vaccine uptake and analysis of personal motivations. A prospective cohort study]. *Assistenza Infermieristica e Ricerca:Air*. 2007 Jan-Mar;26(1):5-13.
13. Wright SW, Decker, Edwards KM. Incidence of pertussis infection in healthcare workers. *Infect Control Hosp Epidemiol*. 1999 Feb;20(2):120-3.
14. Nace DA, Hoffman EL, Resnick NM, Handler SM. Achieving and sustaining high rates of influenza immunization among long-term care staff. *Journal of the American Medical Directors Association*. 2007 Feb;8(2):128-33.
15. Sand KL, Lynn J, Bardenheier B, Seow H, Nace DA. Increasing influenza immunization for long-term care facility staff using quality improvement. *J Am Geriatr Soc*. 2007 Nov;55(11):1741-7.

16. Halliday L, Thomson JA, Roberts L, Bowen S, Mead C. Influenza vaccination of staff in aged care facilities in the ACT: How can we improve the uptake of influenza vaccine?. *Aust N Z J Public Health*. 2003;27(1):70-5.
17. Stevenson CG, McArthur MA, Naus M, Abraham E, McGeer AJ. Prevention of influenza and pneumococcal pneumonia in canadian long-term care facilities: How are we doing?[see comment]. *CMAJ Canadian Medical Association Journal*. 2001 May 15;164(10):1413-9.
18. Qureshi AM, Hughes NJ, Murphy E, Primrose WR. Factors influencing uptake of influenza vaccination among hospital-based health care workers. *Occupational Medicine (Oxford)*. 2004 May;54(3):197-201.
19. Leitmeyer K, Buchholz U, Kramer M, Schenkel K, Stahlhut H, Kollstadt M, et al. Influenza vaccination in german health care workers: Effects and findings after two rounds of a nationwide awareness campaign. *Vaccine*. 2006 Nov 17;24(47-48):7003-8.
20. O'Reilly FW, Cran GW, Stevens AB. Factors affecting influenza vaccine uptake among health care workers. *Occupational Medicine*. 2005;55:474-479.
21. Chittaro M, Turello D, Calligaris L, Farneti F, Faruzzo A, Fiappo E, et al. Impact of vaccinating HCWs on the ward and possible influence of avian flu threat. *Infection*. 2009 Feb;37(1):29-33.
22. Piccirillo B, Gaeta T. Survey on use of and attitudes toward influenza vaccination among emergency department staff in a new york metropolitan hospital. *Infection Control and Hospital Epidemiology*. 2006 Jun;27(6):618-22.
23. Pur S, Vestal A, Connolly P, Segreti J, Trenholme G. Mass vaccination in a hospital setting: The push and pull approaches. *SHEA*.
24. Adal KA, Flowers RH, Anglim AM, Hayden FG, Titus MG, Coyner BJ, et al. Prevention of nosocomial influenza. *Infection Control & Hospital Epidemiology*. 1996 Oct;17(10):641-8.
25. Jones C. Influenza vaccination: Impact on absenteeism among nursing and medical staff in a metropolitan teaching hospital. *Aust Infect Control*. 1999 Spring;4(3):14-7.
26. O'Rourke C, Bourke W, Bedford D, Howell F. Uptake of influenza vaccine by healthcare workers in an acute hospital in ireland. *Irish Medical Journal*. 2003;96(7):207-209.
27. Lee HY, Fong YT. On-site influenza vaccination arrangements improved influenza vaccination rate of employees of a tertiary hospital in singapore. *Am J Infect Control*. 2007 Sep;35(7):481-3.
28. Yang KS, Fong YT, Koh D, Lim MK. High coverage of influenza vaccination among healthcare workers can be achieved during heightened awareness of impending threat. *Ann Acad Med Singap*. 2007 Jun;36(6):384-7.
29. Yassi A, Kettner J, Hammond G. Effectiveness and cost-benefit of an influenza vaccination program for health care workers. *Canadian Journal of Infectious Disease*. 1991;2(3):101-108.
30. Polgreen PM, Septimus EJ, Parry MF, Beekmann SE, Cavanaugh JE, Srinivasan A, et al. Relationship of influenza vaccination declination statements and influenza vaccination rates for healthcare workers in 22 US hospitals. *Infection control and hospital epidemiology*. 2008;29(7):675-677.
31. Smithers P, Murray SB, Stewart S, Skull S. Hospital health care worker (HCW) vaccination coverage after implementation of an HCW vaccination policy. *Australian Health Review*. 2003;26(1):76-83.
32. Fedson DS. Influenza vaccination of medical residents at the university of virginia. *Infection control and hospital epidemiology*. 1996;17:431-433.

33. Primus L. Improving influenza vaccination to health care workers. *Am J Infect Control*. 2009 Jun;37(5):430-1.
34. Garcia De Codes Ilario A, Arrazola Martinez MDP, De Juanes Pardo JR, Gallardo MIS, Herreros FJ, Lopez EL. Influenza vaccination in healthcare workers. strategies to achieve compliance in a general hospital. *Med Clin*. 2004 23 Oct;123(14):532-4.
35. Norton SP, Scheifele DW, Bettinger JA, West RM. Influenza vaccination in paediatric nurses: Cross-sectional study of coverage, refusal, and factors in acceptance. *Vaccine*. 2008 02 Jun;26(23):2942-8.
36. Traeger M, Thompson A, Dickson E, Provencio A. Bridging disparity: A multidisciplinary approach for influenza vaccination in an american indian community. *Am J Public Health*. 2006 May;96(5):921-5.
37. Shah SI, Caprio M. Availability of trivalent inactivated influenza vaccine to parents of neonatal intensive care unit patients and its effect on the healthcare worker vaccination rate. *Infection Control and Hospital Epidemiology*. 2008 Apr;29(4):309-13.
38. Begue RE, Gee SQ. Improving influenza immunization among healthcare workers. *Infect Control Hosp Epidemiol*. 1998 Jul;19(7):518-20.
39. Bryant KA, Stover B, Cain L, Levine GL, Siegel J, Jarvis WR. Improving influenza immunization rates among healthcare workers caring for high-risk pediatric patients. *Infection Control & Hospital Epidemiology*. 2004 Nov;25(11):912-7.
40. Wells P, Faris L, Abell V, Sweigert M, Stephens C. Improving healthcare workers influenza vaccination compliance in acute care settings. *American Journal of Infection Control*. 2008;36(5):E79-E80.
41. Girasek D. Increasing hospital staff compliance with influenza immunization recommendations. *American Journal of Public Health*. 1990;80(10):1272-1273.
42. Smedley J, Palmer C, Baird J, Barker M. A survey of the delivery and uptake of influenza vaccine among health care workers. *Occupational Medicine*. 2002;52(5):271-276.
43. Carman WF, Elder AG, Wallace LA, McAulay K, Walker A, Murray GD, et al. Effects of influenza vaccination of health-care workers on mortality of elderly people in long-term care: A randomised controlled trial. *Lancet*. 2000 Jan 8;355(9198):93-7.
44. Lopes MH, Sartori AM, Mascheretti M, Chaves TS, Andreoli RM, Basso M, et al. Intervention to increase influenza vaccination rates among healthcare workers in a tertiary teaching hospital in brazil \*. *Infection Control & Hospital Epidemiology*. 2008 Mar;29(3):285-6.
45. Takayanagi IJ, Cardoso MRA, Costa SF, Araya ME, Machado CM. Attitudes of health care workers to influenza vaccination: Why are they not vaccinated? *Am J Infect Control*. 2007 Feb;35(1):56-61.
46. Wicker S, Doerr HW, Gottschalk R, Rabenau HF, Allwinn R. [Influenza: Acceptance of vaccination by healthcare personnel. evaluation of the influenza season 2006/2007]. *Dtsch Med Wochenschr*. 2007 Aug;132(33):1683-7.
47. Watanakunakorn C, Ellis G, Gemmel D. Attitude of healthcare personnel regarding influenza immunization. *Infection Control & Hospital Epidemiology*. 1993 Jan;14(1):17-20.
48. Hall KL, Holmes SS, Evans ME. Increasing hospital employee participation in an influenza vaccine program. *American Journal of Infection Control*. 1998;26(3):367-368.
49. Sartor C, TissotDupont H, Zandotti C, Martin F, Roques P, Drancourt M. Use of a mobile cart influenza program for vaccination of hospital employees. *Infect Control Hosp Epidemiol*. 2004 Nov;25(11):918-22.

50. Chamoux A, Denis-Porret M, Rouffiac K, Baud O, Millot-Theis B, Souweine B. Impact study of an active antinfluenza vaccination programme on the clermont-ferrand teaching hospital staff. *Med Mal Infect.* 2006 Mar;36(3):144-50.
51. Elorza Ricart JM, Campins Marti M, Martinez Gomez X, Allepuz Palau A, Ferrer Gramunt E, Mendez-Aguirre Guitian M. [Influenza vaccine and health-care workers: Strategies to achieve compliance in a tertiary hospital]. *Med Clin.* 2002 Oct 12;119(12):451-2.
52. Jacomo V, Sartor C, Zandotti C, Atlan-Gepner C, Drancourt M. Nosocomial influenza outbreak in an intensive-care unit. *Med Mal Infect.* 2001;31(9):563-8.
53. Stewart S, Murray SB, Skull SA. Evaluation of health-care worker vaccination in a tertiary Australian hospital. *Intern Med J.* 2002 Dec;32(12):585-92.
54. Stubbe KK, Luebbert PP, Madison L. Drill down: Increasing influenza vaccination rates while testing for pandemic preparedness. *American Journal of Infection Control.* 2007;35(5):E43.
55. Nichol KL, Hauge M. Influenza vaccination of healthcare workers. *Infect Control Hosp Epidemiol.* 1997 Mar;18(3):189-94.
56. Cynnow E, Wyatt M. Using a mass vaccination exercise to increase compliance with annual flu vaccination while preparing for an influx of potentially infectious patients. *American Journal of Infection Control.* 2008;36(5):E25-e@6.
57. Gornick W, Nelson C, Scalan G, Lang DJ. "Mandatory" influenza immunization (flulmm) of healthcare workers (HCW) at children's hospital of orange county (CHOC). *American Journal of Infection Control.* 2007;35(5):E99.
58. Keedick CS. Increasing healthcare worker influenza vaccination rates via implementing evidence-based interventions. *American Journal of Infection Control.* 2007;35(5):E99-E100.
59. Salgado CD, Giannetta ET, Hayden FG, Farr BM. Preventing nosocomial influenza by improving the vaccine acceptance rate of clinicians. *Infection Control & Hospital Epidemiology.* 2004 Nov;25(11):923-8.
60. Nafziger DA, Herwaldt LA. Attitudes of internal-medicine residents regarding influenza vaccination. *Infection Control and Hospital Epidemiology.* 1994 JAN;15(1):32-5.
61. Ballestas T, McEvoy SP, Doyle J, on behalf of the SMAHS Healthcare Worker Influenza Vaccination Working Party. Co-ordinated approach to healthcare worker influenza vaccination in an area health service. *J Hosp Infect.* 2009 Sep 25.
62. Nicholson MR, Hayes DM, Bennett AM. Partnering with nursing service improves health care worker influenza vaccination rates. *Am J Infect Control.* 2009 August;37(6):484-9.
63. Chance J, Williamson S. A user-friendly approach to improving healthcare worker influenza vaccination compliance. *American Journal of Infection Control.* 2005;33(5):E62.
64. Shannon SC. Community hospitals can increase staff influenza vaccination rates. *American Journal of Public Health.* 1993;83(8):1174-1175.
65. Mehta M, Pastor CA, Shah B. Achieving optimal influenza vaccination rates: A survey-based study of healthcare workers in an urban hospital. *J Hosp Infect.* 2008 Sep;70(1):76-9.
66. Dunais B, Saccomano C, Mousnier A, Roure MC, Dellamonica P, Roger P. Influenza vaccination: Impact of an intervention campaign targeting hospital staff. *Infect Control Hosp Epidemiol.* 2006 May;27(5):529-31.
67. Ilario AGD, Martinez MDA, Pardo JRD, Gallardo MIS, Herreros FJ, Lopez EL. Influenza vaccination in healthcare workers. strategies to achieve compliance in a general hospital. *Med Clin.* 2004 OCT 23;123(14):532-4.

68. Ofstead CL, Tucker SJ, Beebe TJ, Poland GA. Influenza vaccination among registered nurses: Information receipt, knowledge, and decision-making at an institution with a multifaceted educational program. *Infect Control Hosp Epidemiol*. 2008 Feb;29(2):99-106.
69. Samms D, Reed K, Lee T, Barill S, Branham D. Achieving a corporate goal for influenza vaccination using nurse champions. *American Journal of Infection Control*. 2004;32(3):E7-E8.
70. Gazmararian JA, Coleman M, Prill M, Hinman AR, Ribner BS, Washington ML, et al. Influenza vaccination of health care workers: Policies and practices of hospitals in a community setting. *Am J Infect Control*. 2007 Sep;35(7):441-7.
71. McCullers JA, Speck KM, Williams BF, Liang H, Mirro J, Jr. Concise communications. increased influenza vaccination of healthcare workers at a pediatric cancer hospital: Results of a comprehensive influenza vaccination campaign. *Infect Control Hosp Epidemiol*. 2006 Jan;27(1):77-9.
72. Kuntz JL, Holley S, Helms CM, Cavanaugh JE, Vande Berg J, Herwaldt LA, et al. Use of a pandemic preparedness drill to increase rates of influenza vaccination among healthcare workers. *Infection Control & Hospital Epidemiology*. 2008 Feb;29(2):111-5.
73. Ribner BS, Hall C, Steinberg JP, Bornstein WA, Chakkalakal R, Emamifar A, et al. Use of a mandatory declination form in a program for influenza vaccination of healthcare workers. *Infection Control and Hospital Epidemiology*. 2008 Apr;29(4):302-8.
74. Hood J, Smith A. Developing a "best practice" influenza vaccination program for health care workers--an evidence-based, leadership-modeled program. *AAOHN J*. 2009 Aug;57(8):308-12.
75. Polgreen PM, Chen Y, Beekmann S, Srinivasan A, Neill MA, Gay T, et al. Elements of influenza vaccination programs that predict higher vaccination rates: Results of an emerging infections network survey. *Clinical Infectious Diseases*. 2008 Jan 1;46(1):14-9.
76. Polgreen PM, Polgreen LA, Evans T, Helms C. A statewide system for improving influenza vaccination rates in hospital employees. *Infection Control and Hospital Epidemiology*. 2009 MAY;30(5):474-8.
77. Desbiens NA. A 5-year experience with influenza prevention and containment in a program of all-inclusive care for elderly adults. *Am J Infect Control*. 2005 May;33(4):238-42.
78. Heimberger T, Chang HG, Shaikh M, Crotty L, Morse D, Birkhead G. Knowledge and attitudes of health-care workers about influenza - why are they not getting vaccinated. *Infection Control and Hospital Epidemiology*. 1995 JUL;16(7):412-5.
79. Harrison J, Abbott P. Vaccination against influenza: UK health care workers not on-message. *Occupational Medicine*. 2002;52(5):277-279.
80. RothanTondeur M, de Wazieres B, Lejeune B, Gavazzi G. Influenza vaccine coverage for healthcare workers in geriatric settings in france. *Aging Clin Exp Res*. 2006 Dec;18(6):512-6.
81. Bruce G. Paramedic services workplace program improves influenza immunization rates among paramedics. *Can J Infect Control*. 2007 Fall;22(3):156,8, 160-1.
82. D'Heilly SJ, Nichol KL. Work-site-based influenza vaccination in healthcare and non-healthcare settings. *Infect Control Hosp Epidemiol*. 2004 Nov;25(11):941-5.
83. Thomas DR, Winsted B, Koontz C. Improving neglected influenza vaccination among healthcare workers in long-term care. *J Am Geriatr Soc*. 1993 Sep;41(9):928-30.

84. Goldstein AO, Kincade JE, Gamble G, Bearman RS. Policies and practices for improving influenza immunization rates among healthcare workers. *Infection Control & Hospital Epidemiology*. 2004 Nov;25(11):908-11.
85. Borlaug G, Newman A, Pfister J, Davis JP. Factors that influenced rates of influenza vaccination among employees of wisconsin acute care hospitals and nursing homes during the 2005-2006 influenza season. *Infect Control Hosp Epidemiol*. 2007 Dec;28(12):1398-400.
86. Centers for Disease Control and Prevention (CDC). Interventions to increase influenza vaccination of health-care workers--california and minnesota. *MMWR - Morbidity & Mortality Weekly Report*. 2005 Mar 4;54(8):196-9.
87. Immunizing healthcare personnel against influenza: A report on best practices [homepage on the Internet]. . 2007. Available from: <http://www.nfid.org/HCWtoolkit/BestPracticesToolkitDocument.pdf>.
